# Supplementary material for: Bayesian network as a support tool for rapid query of the environmental multimedia distribution of nanomaterials
Source: Royal Society of Chemistry journal article supplement (doi:10.1039/c6nr08583k), 2017-01-01
Supplement: c6nr08583k1.pdf [file c6nr08583k1.pdf]

## Supplementary Information

### Bayesian Network as Support Tool for Rapid Query of the Environmental Multimedia Distribution of Nanomaterials

Muhammad Bilal<sup>1,3</sup>, Haven Liu<sup>1</sup>, Rong Liu<sup>1</sup>, Yoram Cohen<sup>1,\*</sup>

| <b>Contents</b>                                                                                                                                                | <b>Page</b> |
|----------------------------------------------------------------------------------------------------------------------------------------------------------------|-------------|
| 1. Bayesian Networks                                                                                                                                           | S2          |
| 2. BN Model development for the assessment of ENMs exposure modeling                                                                                           | S2          |
| 3. Conditional dependence of ENM environmental concentrations on input parameters                                                                              | S9          |
| 4. Quantification of Parameter Significance in Predicting ENM Environmental Distribution                                                                       | S13         |
| Supplementary Information References                                                                                                                           | S18         |
| Figure S1: Bayesian Network construction for ENM environmental distribution                                                                                    | S5          |
| Figure S2: ENMs compartmental concentrations estimated by MendNano                                                                                             | S6          |
| Figure S3: ENMs release rates in high scenarios estimated by LearNano                                                                                          | S7          |
| Figure S4: Correlation of determination ( $R^2$ ) for ENMs concentrations in high scenarios                                                                    | S8          |
| Figure S5-10: Conditional dependence of ENMs concentrations on parameters for region                                                                           | S9-12       |
| Figure S11: Impact of (a) TiO <sub>2</sub> and (b) CeO <sub>2</sub> ENM attachment to suspended solids (in water) on ENM concentrations in water and sediment. | S13         |
| Table S1: Parameter sensitivity analysis using Alexander's sensitivity indicator                                                                               | S4          |
| Table S2-S9. Parameters for ENMs simulations of environmental distribution in different regions                                                                | S14-17      |
| Table S10: ENMs releases to air, water and soil for low and high                                                                                               | S19         |
| Table S11: Description of exposure model input parameters                                                                                                      | S20         |

## 1 **1. Bayesian Networks**

2 Bayesian Networks (BNs) belong to the family of probabilistic graphical models that are useful for  
3 representing knowledge and reasoning while considering uncertainty. BNs development involves the  
4 construction of a directed acyclic graph (DAG) of available information (parameters) treated as nodes  
5 in the network. The influence/conditional dependence relations among these nodes are represented  
6 qualitatively as arcs between nodes and quantitatively by conditional probability tables (CPTs). In the  
7 present work for situations where data are available (e.g. geographical, meteorological parameters,  
8 release rates and concentrations), the BNs were utilized by constructing network structure and learning  
9 CPTs using available information for ENMs exposure modeling scenarios. The nodes of  
10 continuous/numerical values in BNs are usually discretized into predefined sized ranges called states  
11 (e.g., windspeed can be discretized into the states of distinct ranges). In the particular case of BN for  
12 exposure modeling, an arc from a node (such as windspeed (m/s)) to a child node (such as air  
13 concentration (ng/m<sup>3</sup>)) represents the conditional dependence of concentration on windspeed and  
14 windspeed is called the parent node of concentration. Thus the arrow indicates that an assigned  
15 windspeed directly influences air concentration (manuscript **Fig. 3**). The complexity of BN is dictated  
16 by the dimensionality of the conditional probability tables (constructed based on causal links among  
17 parameters)<sup>1-4</sup> as the size of a CPT of a node in BN is determined by the number of incoming links  
18 (parent nodes), the number of states of each parent node, and the number of states of the node itself.

19

## 20 **2. BN Model development for the assessment of ENMs exposure modeling**

21 In order to develop a data driven predictive model (BN-nanoExpo) for the assessment of ENMs  
22 exposure, the selection of parameters for a range of scenarios was accomplished by first designing a  
23 structure representing the BN nodes relationships (i.e. parameter-concentration). Given the tradeoff

24 between increased model accuracy and the desire for increased generalization, an initial pool of  
 25 parameters to be included in BN-nanoExpo model was selected based on the knowledge derived from  
 26 the fundamental fate and transport model<sup>5</sup>. The resulting 18 parameter-set (including the initial pool)  
 27 was used in sensitivity analysis using Alexander’s sensitivity indicator<sup>6</sup> in order to guide the selection  
 28 of final parameter-set for model development. Using Alexander’s indicator, each parameter was varied  
 29 sequentially (from minimum to maximum) and the sum of the squared differences for the resulting  
 30 concentration vectors (air, water, soil and sediment) was calculated (**Table S1**). The range of the  
 31 differences was from 0 – 1 indicating 1 as the maximum possible sensitivity or effect on resulting  
 32 concentrations, where the cutoff threshold was set to 0.97 (any parameter with sensitivity indicator  $\geq$   
 33 0.03) for the selection of parameters in final pool. The indicator’s measure of sensitivity of the  
 34 concentrations to changes in model parameters is given by

$$S = \frac{\sum_{i=1}^N \frac{(O_{ik} - O_{ij})^2}{O_{ij}}}{\sum_{i=1}^N \frac{(O_{ik} - O_{ij})^2}{max}} \quad (1)$$

36 in which,  $O_{ij}$  is the concentration of unit  $i$  {air, water, soil, sediment} with variable at  
 37 (previous/minimum) value  $j$ ,  $O_{ik}$  is the concentration of unit  $i$  with variable at (changed/maximum)  
 38 value  $k$ , and  $N$  is the number of units.

39 The sensitivity analysis suggested the ranking of the BN-nanoExpo parameters listed in (**Table S1**).  
 40 It is noted that the indicator values are subject to the ranges selected for parameters. The top five  
 41 parameters (in the order of decreasing significance) were ENM releases (to air, water, soil), rainfall, and  
 42 windspeed. Temperature, land and water areas were also of significance (sensitivity indicator  $> 0.03$ ).

43 The quantification of parameter-concentration relationships in BN-nanoExpo was obtained by  
 44 learning the CPT of each node using the exposure data training set. The use of a mechanistic model  
 45 (MendNano) for estimating the environmental distribution of ENMs provided the estimated  
 46 concentrations at regular time intervals over a one-year simulation period. As an illustration, the  
 47 predicted compartmental concentrations of TiO<sub>2</sub> in Bern (Switzerland) (with size distribution in air given  
 48 as ( $\mu = 179\text{nm}$ )) are shown in **Fig. S1**.

49 **Table S1:** Parameter sensitivity analysis using Alexander’s sensitivity indicator

| <b>Parameter</b>                     | <b>Unit</b>       | <b>Minimum</b> | <b>Maximum</b> | <b>Sensitivity indicator</b> |
|--------------------------------------|-------------------|----------------|----------------|------------------------------|
| Atmospheric mixing height            | meters            | 300            | 2000           | $10^{-3}$                    |
| Soil (top layer) depth               | inches            | 1              | 8              | $10^{-3}$                    |
| Water body depth                     | meters            | 1              | 5              | $10^{-3}$                    |
| Soil bulk density                    | g/cm <sup>3</sup> | 1.1            | 1.65           | $10^{-3}$                    |
| Sediment bulk density                | g/cm <sup>3</sup> | 1.1            | 2.5            | $1.1 \times 10^{-3}$         |
| Suspended solids density             | g/cm <sup>3</sup> | 1.5            | 1.65           | $1.2 \times 10^{-3}$         |
| NP attachment factor (air)           | (%)               | 0              | 100            | $1.8 \times 10^{-3}$         |
| NP attachment factor (water)         | (%)               | 0              | 100            | $1.8 \times 10^{-3}$         |
| Atmosphere convective residence time | hour              | 1              | 50             | $3 \times 10^{-3}$           |
| Water convective residence time      | hour              | 1              | 50             | $4 \times 10^{-3}$           |
| Air-soil interfacial area            | km <sup>2</sup>   | 1              | 1200           | $7.3 \times 10^{-2}$         |
| Air-water interfacial area           | km <sup>2</sup>   | 1              | 100            | $5.5 \times 10^{-2}$         |
| Average monthly air temperature      | C                 | 1              | 40             | $3 \times 10^{-2}$           |
| Average monthly wind speed           | m/s               | 1              | 8              | $3 \times 10^{-2}$           |
| Average monthly rainfall             | mm/month          | 10             | 1000           | $3 \times 10^{-2}$           |
| Release rate to air                  | kg                | 50             | 1000           | 0.11                         |
| Release rate to water                | kg                | 100            | 1000           | 0.12                         |
| Release rate to soil                 | kg                | 50             | 1000           | 1                            |

50  
 51 Temporal ENM media concentrations from MendNano were provided for a typical period of 365  
 52 days (1 sample per hour, **Fig-S1**). In principle, temporal ENMs’ media concentrations can be modeled  
 53 by the variants of BNs called dynamic Bayesian networks (DBNs) which provide a versatile approach  
 54 to model the temporal system dynamics and prediction of the system state (e.g., ENMs concentrations)  
 55 at a future time-step. DBNs are a special case of a singly connected BN aimed at time-series data

56 analysis, where identical BN sub-models are duplicated over each time-step and the links between model  
57 parameters, as well as time slices that can change according to the system state at each time slice.

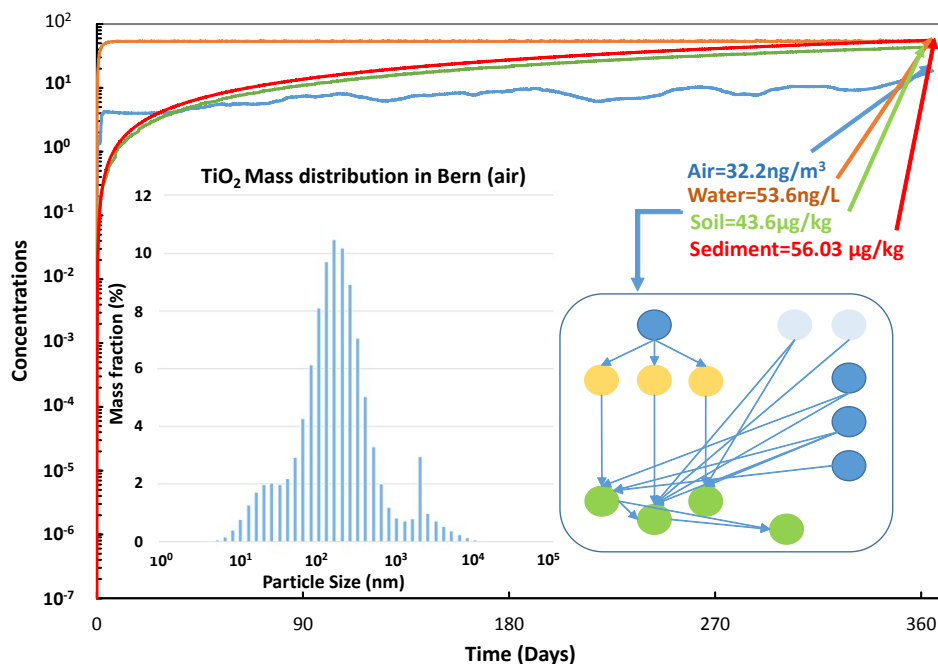

58  
59 **Figure S1:** Temporal profile of TiO<sub>2</sub> environmental concentrations in Bern (Switzerland) starting with  
60 clean environment. Following a well-established concept of annual cumulative distribution, the  
61 concentrations for one-year simulation time period were utilized to construct the BN conditional  
62 probability tables (CPTs).  
63

64 The environmental distributions of ENMs for low releases (in air, water, soil and sediment) were  
65 estimated using MendNano for both the training and test sets (Experimental Section). The resulting  
66 concentrations from the training set served to construct the BN-nanoExpo model. The adequacy of the  
67 resulting BN was then assessed via correlation analysis of predicted MendNano estimated  
68 concentrations and the predicted concentrations by BN-nanoExpo for test set. The log<sub>10</sub> transformed  
69 values of the environmental concentrations for the test set are shown in **Fig. S2** as heatmaps. The results  
70 revealed that the lowest estimated exposure concentrations in air (**Fig. S2 (a)**) and water (**Fig. S2 (b)**)  
71 were for nano Cu (1) in air in Houston (-2.63 (2.4×10<sup>-3</sup> ng/m<sup>3</sup>)), and (2) in water in New York (-3.46  
72 (3.5 × 10<sup>-4</sup> ng/L)). Exposure concentrations for TiO<sub>2</sub> and ZnO in air and water were relatively higher.

73 The highest exposure concentrations in air (atmosphere) was for TiO<sub>2</sub> in Berlin (1.81 (~65 ng/m<sup>3</sup>)) and  
 74 the highest exposure concentration in water was for TiO<sub>2</sub> in Bern (1.97 (~94 ng/L)).

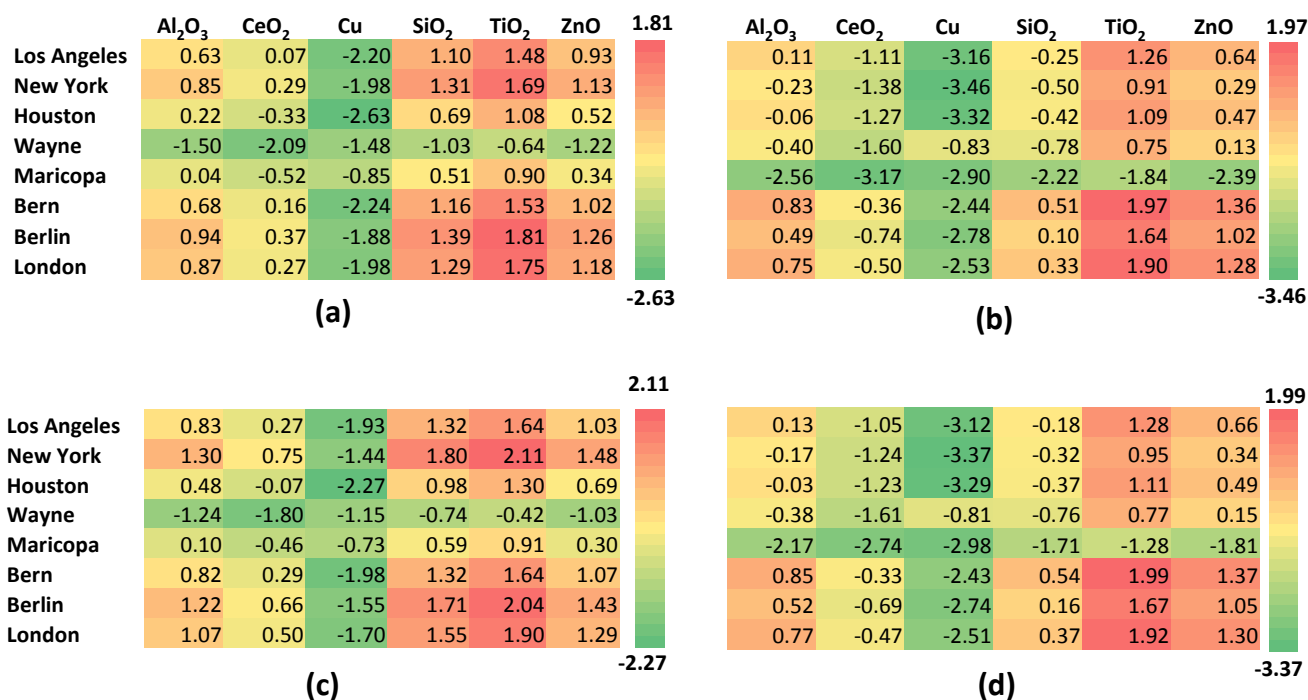

75  
 76 **Figure. S2:** ENM Concentrations (log<sub>10</sub> transformed) in **(a)** air (ng/m<sup>3</sup>), **(b)** water (ng/L), **(c)** soil (µg/kg),  
 77 and **(d)** sediment (µg/kg) estimated by MendNano for 8 selected cities.

78

79 The environmental concentrations of ENMs estimated by MendNano in soil and sediment (**Fig. S2**  
 80 **(c, d)**) were also reported as heatmaps. The lowest estimated compartmental exposure concentrations in  
 81 both soil (**Fig. S2 (c)**) and sediment (**Fig. S2 (d)**) were of nano Cu which were; (1) in soil in Houston (-  
 82 2.27 (5.3 × 10<sup>-3</sup> µg/kg)), and (2) in sediment in New York (-3.37 (4.3 × 10<sup>-4</sup> µg/kg)). Exposure  
 83 concentrations for TiO<sub>2</sub> and ZnO in soil and sediment were higher among the six ENMs due in part to  
 84 the higher ENM release rates. The highest exposure concentration of TiO<sub>2</sub> in sediment in Bern of ~98  
 85 µg/kg (1.99), was likely due to higher release rates as well as higher exposure concentration in water in  
 86 the above region (as there is a causal relationship of concentration in water with the concentration in  
 87 sediment). The low release scenarios, estimated using LearNano (**Fig. S3a**) with ENMs apportionment

88 air, water and soil (Fig. S3(b)), demonstrated the highest overall ENM releases in New York, London,  
 89 and Berlin (in decreasing order) and the lowest overall ENMs releases were in Wayne and Maricopa.

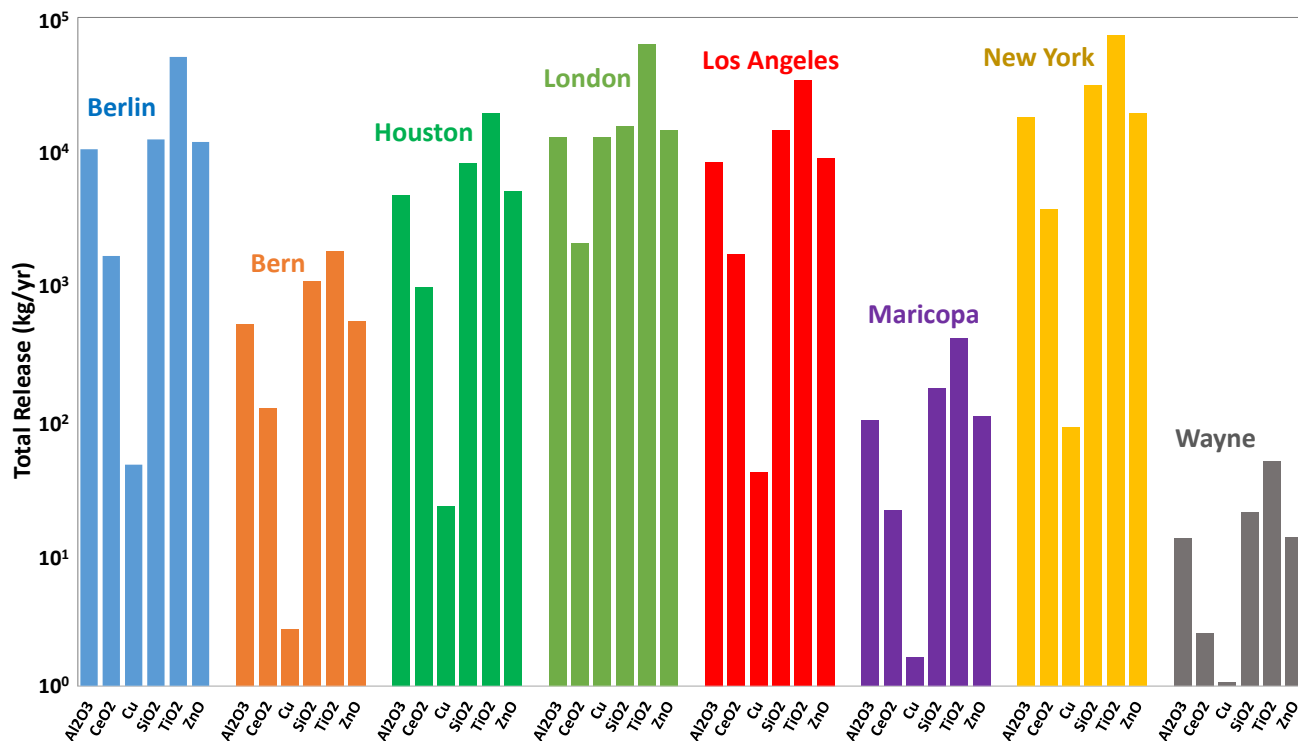

90  
 91 **Figure. S3 (a):** Low end estimates of the ENMs total releases (kg/yr) for the indicated cities

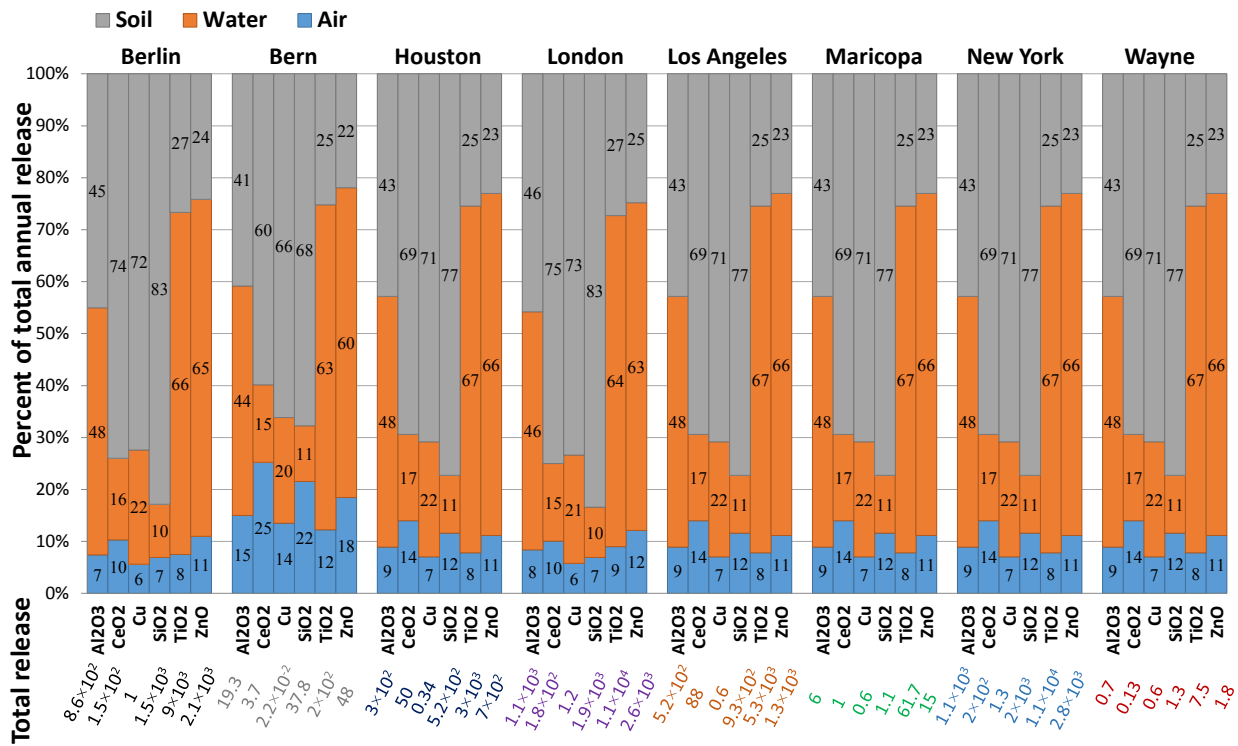

92

93 **Figure S3 (b):** Stacked bar of low estimates of ENM releases to air, water and soil as percentage of the  
94 total ENM release for the indicated cities. The total releases (kg/year) for each ENM are reported below  
95 the bar charts. Note that the estimated release rates of SiO<sub>2</sub>, TiO<sub>2</sub> and ZnO are higher in all cities  
96 compared to the release rates of other selected ENMs.

97       Given the low estimated of release rates of ENMs in the selected cities, BN-nanoExpo predictions  
98 demonstrated excellent correlation of  $R^2$  of 0.97, 0.94, 0.96, and 0.95 with MendNano simulations for  
99 air, water, soil, and sediment respectively (**Fig. S4**). The correlations between MendNano estimations  
100 and BN-nanoExpo predictions indicate that the cause-effect relationships were adequately represented  
101 by the BN-nanoExpo model which provide a basis for interrogating the conditional dependence of  
102 ENMs multimedia concentrations on model parameters.



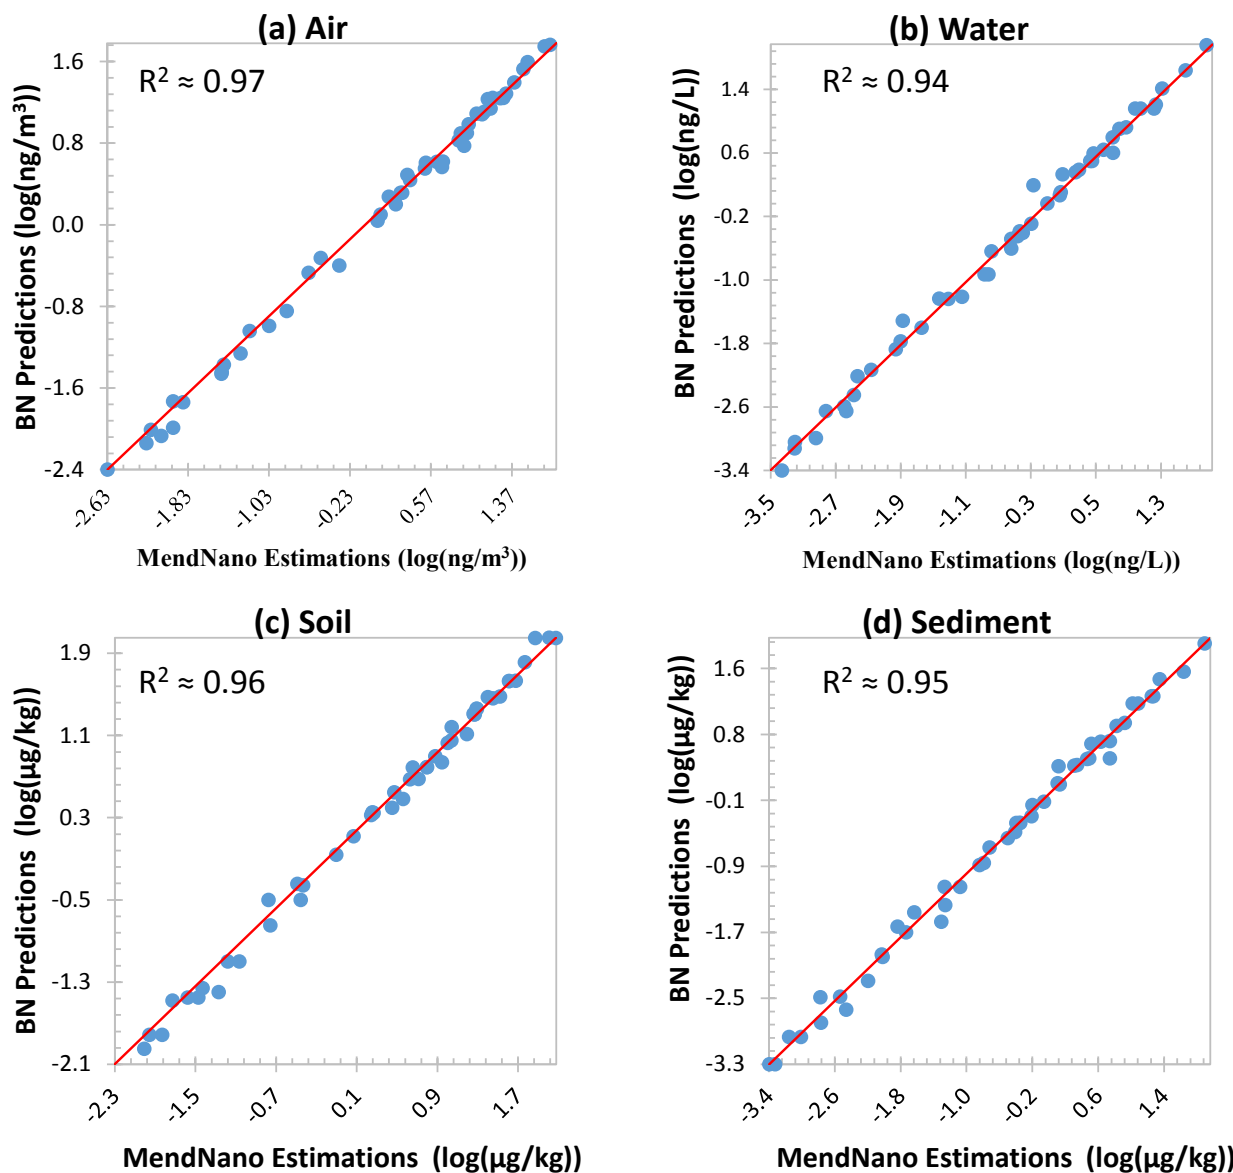

103  
 104 **Fig. S4:** Observed MendNano estimations vs BN predictions of environmental media concentrations  
 105 along with  $R^2$  for all four compartments (a) air, (b) water, (c) soil, and (d) sediment.

### 106 3. Conditional dependence of ENMs concentrations on input parameters

107 In data driven modeling approaches, the complexity and dimensionality of information poses a  
 108 challenge for a model to; (i) visually integrate parameters of different types, (ii) represent the conditional  
 109 dependence of various parameters, and (iii) investigate the effects of subsets of parameters on the  
 110 outcomes of interest. In this regard, BNs are especially advantageous since they enable the visualization  
 111 of the conditional parameter-parameter and/or parameter-outcome dependences. Using BNs, one can

112 select a partial line of evidence and assess the impact of selected subset on target outcome. Specifically,  
 113 the BN model rapid assessment of the impact of uncertainty in multiple parameters either individually  
 114 or simultaneously expressed as normal distributions about the mode, on the resulting compartmental  
 115 concentrations. As an illustration of the above a number of test cases are shown in **Figs. S5 – S10** for  
 116  $\text{Al}_2\text{O}_3$ ,  $\text{CeO}_2$ , Cu,  $\text{SiO}_2$ ,  $\text{TiO}_2$  and ZnO whereby the impact of uncertainties in multiple parameters  
 117 (expressed in terms of normal distributions) was evaluated with respect to the resulting distributions of  
 118 the ENMs concentrations in the various environmental media.

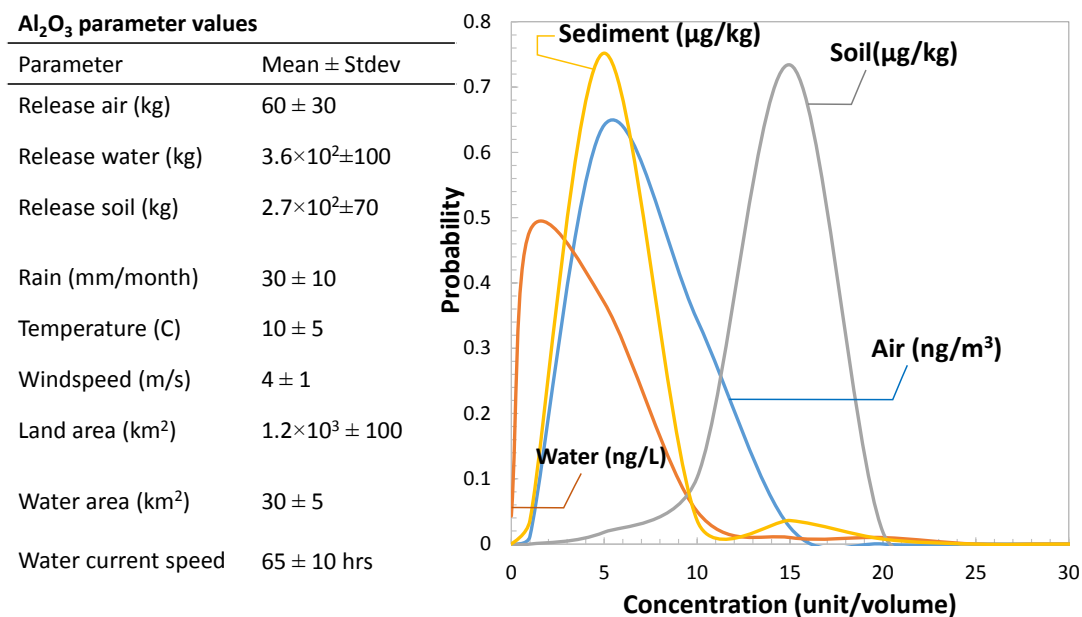

119  
 120 **Figure S5:** Predicted compartmental concentrations of  $\text{Al}_2\text{O}_3$  for the range of parameter values. The  
 121 conditional dependence relationships demonstrate that lower releases of  $\text{Al}_2\text{O}_3$  (air = 60kg, water =  
 122 360kg, soil = 270kg) in land area = 1220 $\text{km}^2$  and water area = 30  $\text{km}^2$  resulted in lower compartmental  
 123 concentrations than those of  $\text{TiO}_2$ ,  $\text{SiO}_2$ , and ZnO (**Fig. S6-S9**).

| TiO <sub>2</sub> parameter values |                           |
|-----------------------------------|---------------------------|
| Parameter                         | Mean ± Stdev              |
| Release air (kg)                  | 6.5×10 <sup>2</sup> ± 100 |
| Release water (kg)                | 4.8×10 <sup>3</sup> ±300  |
| Release soil (kg)                 | 1.1×10 <sup>3</sup> ±200  |
| Rain (mm/month)                   | 30 ± 10                   |
| Temperature (C)                   | 17 ± 5                    |
| Windspeed (m/s)                   | 2.85 ± 0.5                |
| Land area (km <sup>2</sup> )      | 1.2×10 <sup>3</sup> ± 100 |
| Water area (km <sup>2</sup> )     | 75 ± 10                   |
| Water current speed               | 35 ± 5 hrs                |

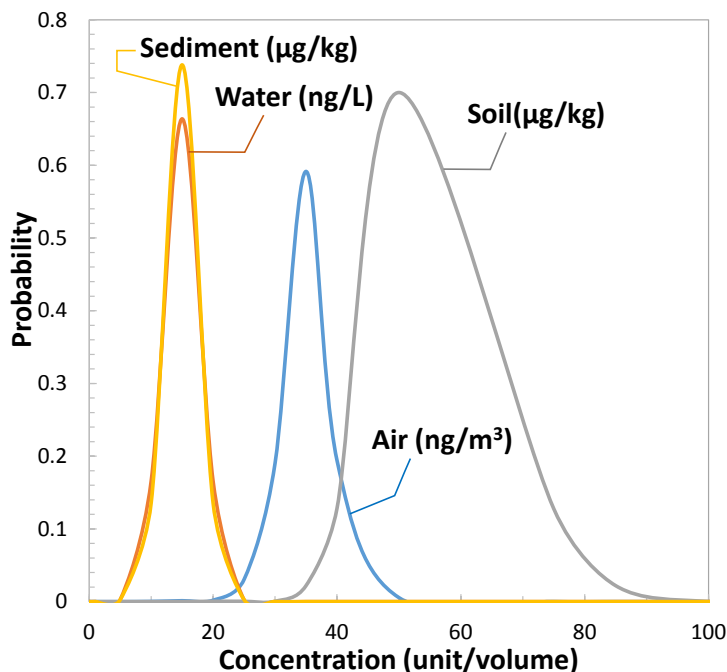

124  
 125 **Figure S6:** Distribution of predicted compartmental concentrations of TiO<sub>2</sub> for the range of parameter  
 126 values (i.e., parameter uncertainty).  
 127

| TiO <sub>2</sub> parameter values |                           |
|-----------------------------------|---------------------------|
| Parameter                         | Mean ± Stdev              |
| Release air (kg)                  | 9.8×10 <sup>2</sup> ± 150 |
| Release water (kg)                | 4.8×10 <sup>3</sup> ±300  |
| Release soil (kg)                 | 2.3×10 <sup>3</sup> ±70   |
| Rain (mm/month)                   | 30 ± 10                   |
| Temperature (C)                   | 10 ± 5                    |
| Windspeed (m/s)                   | 2.85 ± 0.5                |
| Land area (km <sup>2</sup> )      | 1.5×10 <sup>3</sup> ± 200 |
| Water area (km <sup>2</sup> )     | 0.2 ± 3                   |
| Water current speed               | 21 ± 3 days               |

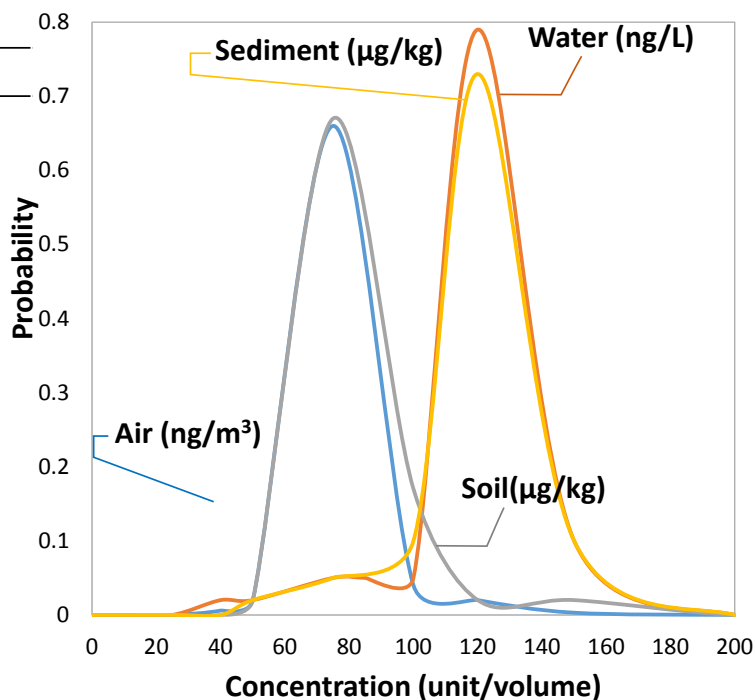

128  
 129 **Figure S7:** Distribution of predicted compartmental concentrations of TiO<sub>2</sub> for the range of parameter  
 130 values (i.e., uncertainties). The effect of higher releases of TiO<sub>2</sub> on compartmental concentrations is  
 131 shown as their probability distributions. Compartmental concentrations of TiO<sub>2</sub> (air ≈ 75 ng/m<sup>3</sup>, water  
 132 ≈ 85 ng/L, soil ≈ 120 µg/kg, sediment ≈ 75 µg/kg) resulted higher (compared to Fig. S6) due to higher  
 133 release rates (air = 980kg, water = 2.3×10<sup>3</sup>, soil=2.3×10<sup>3</sup>) and updated geographical parameters (land  
 134 area = 1500km<sup>2</sup>, water area = 0.2 km<sup>2</sup>).

**ZnO parameter values**

| Parameter                     | Mean ± Stdev              |
|-------------------------------|---------------------------|
| Release air (kg)              | $2.3 \times 10^2 \pm 50$  |
| Release water (kg)            | $1.3 \times 10^3 \pm 150$ |
| Release soil (kg)             | $5.5 \times 10^2 \pm 100$ |
| Rain (mm/month)               | $45 \pm 15$               |
| Temperature (C)               | $10 \pm 5$                |
| Windspeed (m/s)               | $2.85 \pm 0.5$            |
| Land area (km <sup>2</sup> )  | $8.5 \times 10^2 \pm 100$ |
| Water area (km <sup>2</sup> ) | $50 \pm 10$               |
| Water current speed           | $35 \pm 5$ hrs            |

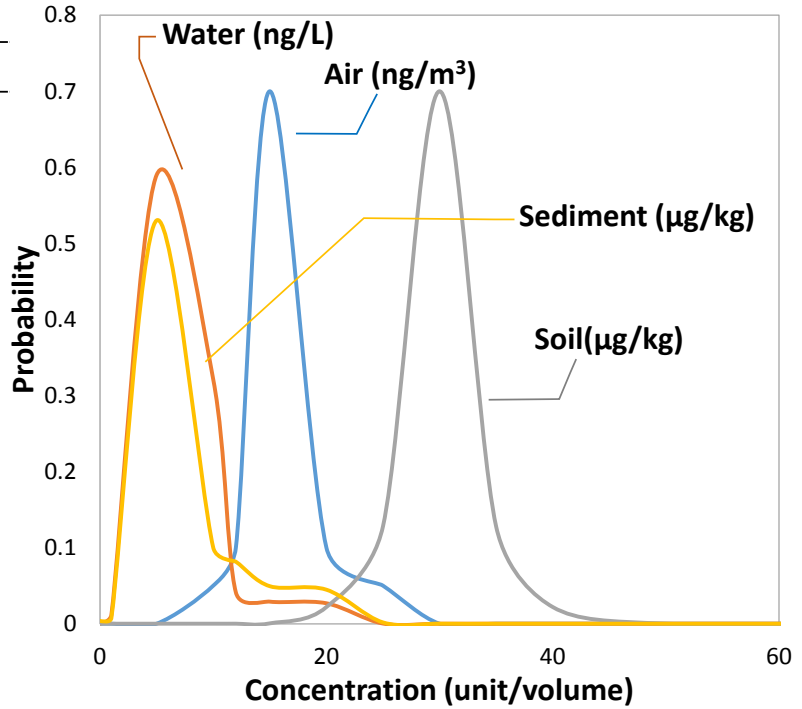

135  
136 **Figure S8:** Distribution of predicted compartmental concentrations of ZnO for the range of parameter  
137 values (uncertainties).

**SiO<sub>2</sub> parameter values**

| Parameter                     | Mean ± Stdev              |
|-------------------------------|---------------------------|
| Release air (kg)              | $1.1 \times 10^2 \pm 25$  |
| Release water (kg)            | $1.6 \times 10^2 \pm 30$  |
| Release soil (kg)             | $5.5 \times 10^2 \pm 100$ |
| Rain (mm/month)               | $50 \pm 15$               |
| Temperature (C)               | $11 \pm 5$                |
| Windspeed (m/s)               | $2.85 \pm 0.5$            |
| Land area (km <sup>2</sup> )  | $9.5 \times 10^2 \pm 100$ |
| Water area (km <sup>2</sup> ) | $80 \pm 15$               |
| Water current speed           | $65 \pm 10$ hrs           |

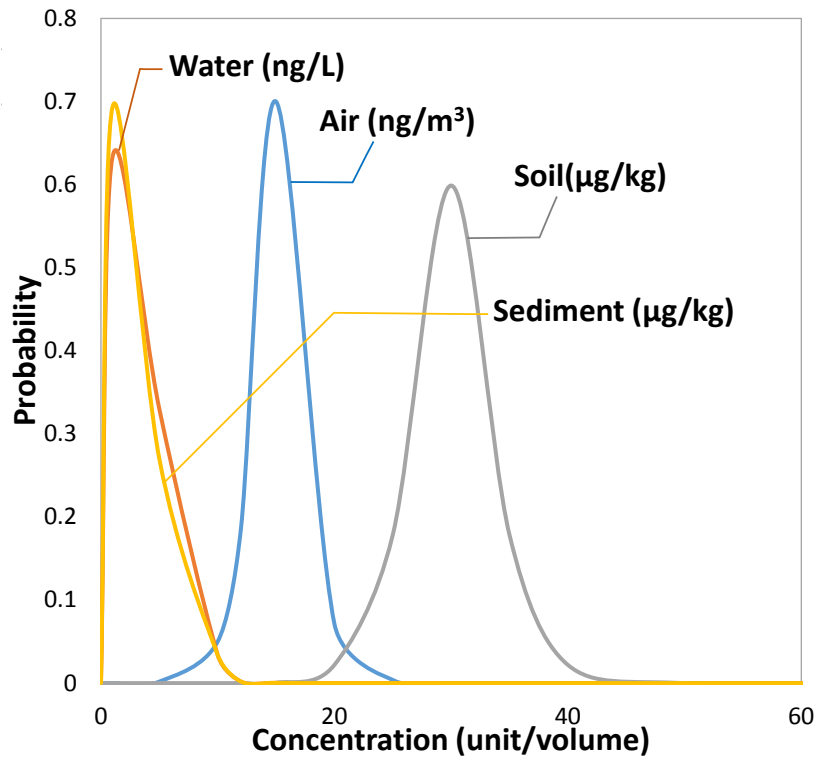

138  
139 **Figure S9:** Distribution of predicted compartmental concentrations of SiO<sub>2</sub> for the range of parameter  
140 values (uncertainties).

| Cu parameter values           |                            |
|-------------------------------|----------------------------|
| Parameter                     | Mean ± Stdev               |
| Release air (kg)              | $7 \times 10^{-2} \pm 100$ |
| Release water (kg)            | $0.2 \pm 5$                |
| Release soil (kg)             | $0.5 \pm 5$                |
| Rain (mm/month)               | $50 \pm 15$                |
| Temperature (C)               | $20 \pm 5$                 |
| Windspeed (m/s)               | $3.5 \pm 0.5$              |
| Land area (km <sup>2</sup> )  | $10^3 \pm 100$             |
| Water area (km <sup>2</sup> ) | $90 \pm 15$                |
| Water current speed           | $15 \pm 3$ days            |

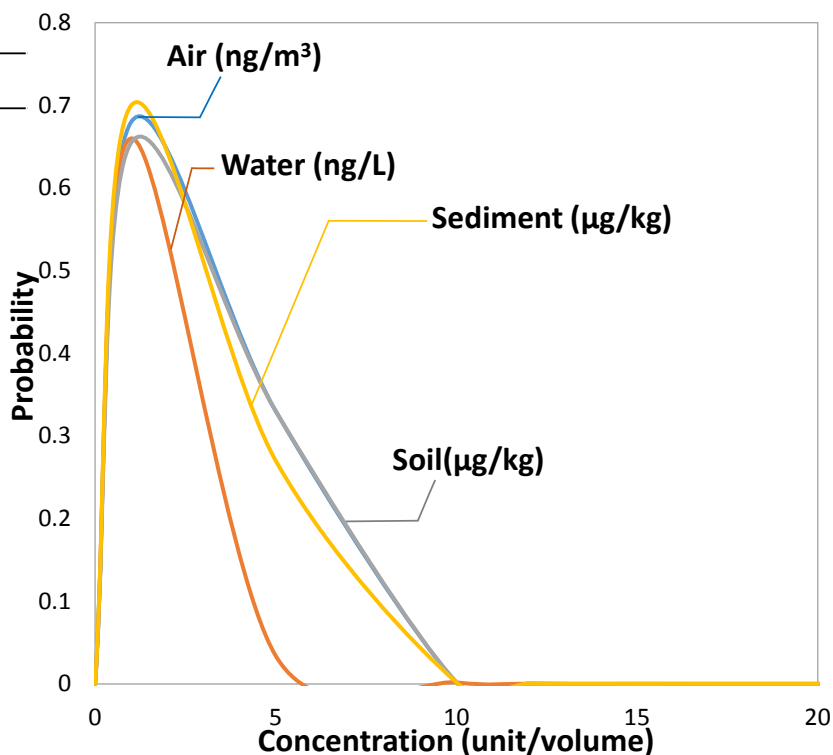

141  
 142 **Figure S10:** Distribution of predicted compartmental concentrations of nano-Cu for the range of  
 143 parameter values (uncertainties).

144  
 145 It is important to recognize that ambient particles are present (in both air and water) at significantly  
 146 higher number concentrations relative to those which may be expected based solely on potential releases  
 147 of ENMs<sup>7</sup>. Therefore, ENMs are likely to be associated with ambient particulates (due to various  
 148 surface–surface interactions<sup>8</sup>) given the high available surface area of ambient particles and tendency of  
 149 most ENMs to agglomerate<sup>9–11</sup>. The particle size of ambient aerosols typically ranges from 0.001 to 2  
 150 µm with particle size distribution (PSD) typically described by a trimodal log-normal size  
 151 distribution<sup>11</sup>. Suspended solids in natural water bodies are typically in the size range of 0.01–1 µm for  
 152 lakes<sup>12</sup>, 1–100 µm for oceans<sup>13</sup>, and 30–150 µm for rivers<sup>14</sup>, and log-normal size distributions have been  
 153 often reported<sup>7</sup>, with a concentration range that can vary significantly (30 µg L<sup>-1</sup>–200 mg L<sup>-1</sup>–  
 154 1)<sup>15,16</sup> depending on the specific water body. Here we note that previous work has shown that under  
 155 most conditions essentially all ENMs would be attached to ambient particles<sup>7</sup>. The extent of

156 heteroaggregation, however, can be quantified via an attachment efficiency or an attachment factor<sup>5</sup>, the  
 157 latter representing the approach followed in the present work. Figure S11 provides an example of the  
 158 impact of the attachment factor impact on the concentrations of (a) TiO<sub>2</sub> and (b) CeO<sub>2</sub> in water and  
 159 sediment (for Houston (United States)) with emission rates estimated by LearNano<sup>5,18</sup> along with the  
 160 relevant geographical and meteorological parameters. As the attachment factor increases from 0.75 to  
 161 1, the ENMs concentration (as suspended matter) in water decreases, while the concentration in the  
 162 sediment increases.

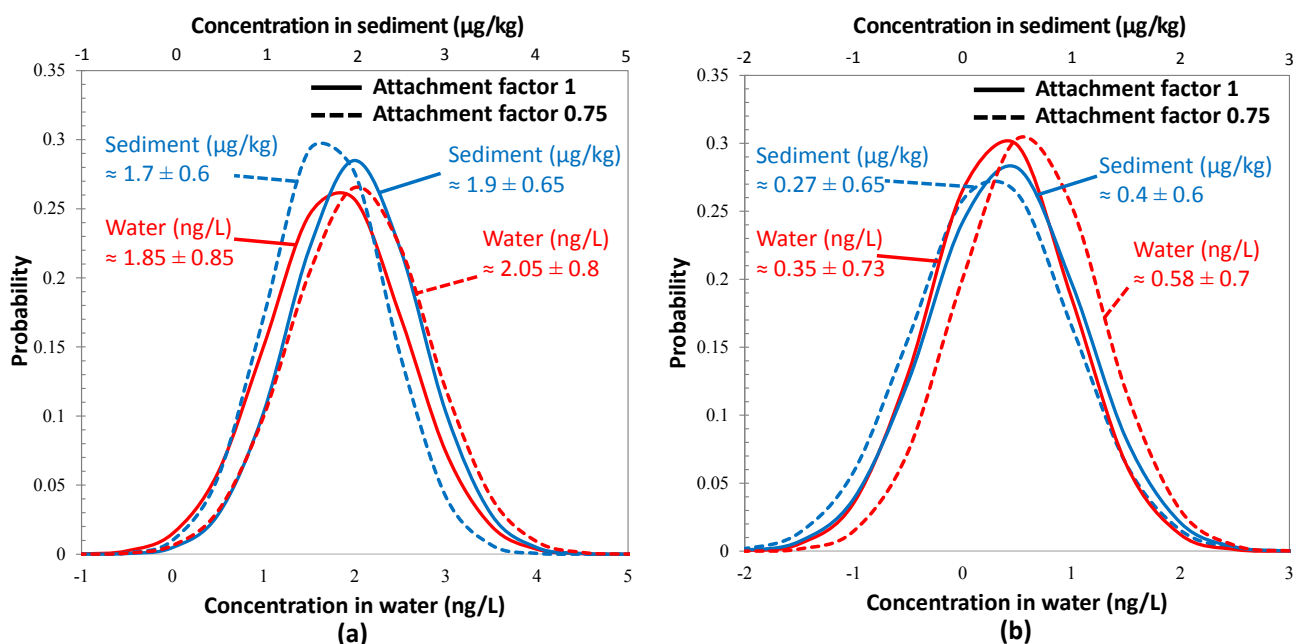

163

164 **Figure S11.** Impact of (a) TiO<sub>2</sub> and (b) CeO<sub>2</sub> ENM attachment to suspended solids (in water) on ENM  
 165 concentrations in water and sediment in Houston.

166

#### 167 4. Quantification of Parameter Significance in Predicting ENM Environmental Distribution

168 The BN-nanoExpo model allows rapid assessment of the distribution of compartmental  
 169 concentrations as impacted by input parameter uncertainty. BN sensitivity analysis allows one to  
 170 determine the influence of input parameters on the resulting ENM environmental concentrations. Here,  
 171 sensitivity analysis was conducted via exhaustive search whereby each parameter was sequentially

172 varied to quantify its impact, on the predicted ENM concentrations, in terms of the reduction in variance  
 173 of predicted outcome. Accordingly, the parameter that reduces the variance of the target outcome to the  
 174 largest degree is considered most significant. Accordingly, the reduction in variance of ENM  
 175 environmental concentrations was quantified as the square of the Root Mean Square (RMS) change in  
 176 ENM concentration given as follows

$$Vr = V(Q) - V(Q|f) \quad (2)$$

where  $V(Q) = \sum_q P(q)[Xq - E(Q)]^2 \quad (3)$

$$V(Q|f) = \sum_q P(q|f)[Xq - E(Q|f)]^2 \quad (4)$$

and  $E(Q) = \sum_q P(q)Xq \quad (5)$

177 where  $Q$  is the query node (ENM compartmental concentration),  $F$  is varying node (input parameter),  
 178  $q$  is the state of  $Q$ ,  $f$  is a state of  $F$ ,  $Xq$  is the numeric real value corresponding to state  $q$ ,  $V(Q)$  is the  
 179 variance of the real value of  $Q$  without any new evidence,  $V(Q|f)$  is the variance of the real value of  $Q$   
 180 with evidence  $f$  at  $F$ ,  $E(Q)$  is the expected real value of  $Q$  without any evidence and  $E(Q|f)$  is the  
 181 expected real value of  $Q$  given evidence  $f$  for node  $F$ .

182 **Table S2:** Parameters for simulation of environmental distribution of ENMs in Berlin (Germany)

| Parameter                                                                                                                    | Parameter value                                                            |
|------------------------------------------------------------------------------------------------------------------------------|----------------------------------------------------------------------------|
| Air-soil interfacial area                                                                                                    | 832 km <sup>2</sup>                                                        |
| Air-water interfacial area                                                                                                   | 59.7 km <sup>2</sup>                                                       |
| Average rainfall                                                                                                             | 49.7 mm/month                                                              |
| Average wind speed                                                                                                           | 4.3 m/s                                                                    |
| Average air temperature                                                                                                      | 9 C                                                                        |
| Release rate to air<br>[Al <sub>2</sub> O <sub>3</sub> , CeO <sub>2</sub> , Cu, SiO <sub>2</sub> , TiO <sub>2</sub> , ZnO]   | [64, 15, 0.05, 105, 665, 236] kg/year                                      |
| Release rate to water<br>[Al <sub>2</sub> O <sub>3</sub> , CeO <sub>2</sub> , Cu, SiO <sub>2</sub> , TiO <sub>2</sub> , ZnO] | [410.5, 23, 0.21, 156, 5.8×10 <sup>3</sup> , 1.4×10 <sup>3</sup> ] kg/year |
| Release rate to soil<br>[Al <sub>2</sub> O <sub>3</sub> , CeO <sub>2</sub> , Cu, SiO <sub>2</sub> , TiO <sub>2</sub> , ZnO]  | [389, 108.5, 0.7, 1.3×10 <sup>3</sup> , 2.5×10 <sup>3</sup> , 518] kg/year |

183  
 184  
 185

186 **Table S3:** Parameters for simulation of environmental distribution of ENMs in Bern (Switzerland)

| Parameter                                                                                                                    | Parameter value                                         |
|------------------------------------------------------------------------------------------------------------------------------|---------------------------------------------------------|
| Air-soil interfacial area                                                                                                    | 51 km <sup>2</sup>                                      |
| Air-water interfacial area                                                                                                   | 0.6 km <sup>2</sup>                                     |
| Average rainfall                                                                                                             | 86 mm/month                                             |
| Average wind speed                                                                                                           | 1.6 m/s                                                 |
| Average air temperature                                                                                                      | 9.4 C                                                   |
| Release rate to air<br>[Al <sub>2</sub> O <sub>3</sub> , CeO <sub>2</sub> , Cu, SiO <sub>2</sub> , TiO <sub>2</sub> , ZnO]   | [3, 0.9, 3×10 <sup>-3</sup> , 8.1, 23.3, 9] kg/year     |
| Release rate to water<br>[Al <sub>2</sub> O <sub>3</sub> , CeO <sub>2</sub> , Cu, SiO <sub>2</sub> , TiO <sub>2</sub> , ZnO] | [8.5, 0.5, 4.5×10 <sup>-3</sup> , 4, 119, 28.6] kg/year |
| Release rate to soil<br>[Al <sub>2</sub> O <sub>3</sub> , CeO <sub>2</sub> , Cu, SiO <sub>2</sub> , TiO <sub>2</sub> , ZnO]  | [8, 2.2, 1.4×10 <sup>-2</sup> , 26, 48, 10.5] kg/year   |

187

188

189 **Table S4:** Parameters for simulation of environmental distribution of ENMs in Houston (USA)

| Parameter                                                                                                                    | Parameter value                                                              |
|------------------------------------------------------------------------------------------------------------------------------|------------------------------------------------------------------------------|
| Air-soil interfacial area                                                                                                    | 1553 km <sup>2</sup>                                                         |
| Air-water interfacial area                                                                                                   | 72.3 km <sup>2</sup>                                                         |
| Average rainfall                                                                                                             | 114 mm/month                                                                 |
| Average wind speed                                                                                                           | 3.4 m/s                                                                      |
| Average air temperature                                                                                                      | 21.3 C                                                                       |
| Release rate to air<br>[Al <sub>2</sub> O <sub>3</sub> , CeO <sub>2</sub> , Cu, SiO <sub>2</sub> , TiO <sub>2</sub> , ZnO]   | [26, 7, 2.3×10 <sup>-2</sup> , 61, 232, 80.5] kg/year                        |
| Release rate to water<br>[Al <sub>2</sub> O <sub>3</sub> , CeO <sub>2</sub> , Cu, SiO <sub>2</sub> , TiO <sub>2</sub> , ZnO] | [140.7, 8.3, 7.4×10 <sup>-2</sup> , 58.3, 1.9×10 <sup>3</sup> , 476] kg/year |
| Release rate to soil<br>[Al <sub>2</sub> O <sub>3</sub> , CeO <sub>2</sub> , Cu, SiO <sub>2</sub> , TiO <sub>2</sub> , ZnO]  | [125, 35, 0.24, 405.3, 758, 166.3] kg/year                                   |

190

191 **Table S5:** Parameters for simulation of environmental distribution of ENMs in London (UK)

| Parameter                                                                                                                    | Parameter value                                                              |
|------------------------------------------------------------------------------------------------------------------------------|------------------------------------------------------------------------------|
| Air-soil interfacial area                                                                                                    | 1572 km <sup>2</sup>                                                         |
| Air-water interfacial area                                                                                                   | 10 <sup>-4</sup> km <sup>2</sup>                                             |
| Average rainfall                                                                                                             | 48.6 mm/month                                                                |
| Average wind speed                                                                                                           | 3.6 m/s                                                                      |
| Average air temperature                                                                                                      | 11 C                                                                         |
| Release rate to air<br>[Al <sub>2</sub> O <sub>3</sub> , CeO <sub>2</sub> , Cu, SiO <sub>2</sub> , TiO <sub>2</sub> , ZnO]   | [89.7, 18.3, 7×10 <sup>-2</sup> , 132, 980, 319] kg/year                     |
| Release rate to water<br>[Al <sub>2</sub> O <sub>3</sub> , CeO <sub>2</sub> , Cu, SiO <sub>2</sub> , TiO <sub>2</sub> , ZnO] | [489, 27.1, 0.25, 184, 6.9×10 <sup>3</sup> , 1.6×10 <sup>3</sup> ] kg/year   |
| Release rate to soil<br>[Al <sub>2</sub> O <sub>3</sub> , CeO <sub>2</sub> , Cu, SiO <sub>2</sub> , TiO <sub>2</sub> , ZnO]  | [489, 136.3, 0.9, 1.6×10 <sup>3</sup> , 2.9×10 <sup>3</sup> , 651.3] kg/year |

192



193 **Table S6:** Parameters for simulation of environmental distribution of ENMs in Los Angeles (USA)

| <b>Parameter</b>                                                                                                             | <b>Parameter value</b>                                       |
|------------------------------------------------------------------------------------------------------------------------------|--------------------------------------------------------------|
| Air-soil interfacial area                                                                                                    | 1213.9 km <sup>2</sup>                                       |
| Air-water interfacial area                                                                                                   | 88.1 km <sup>2</sup>                                         |
| Average rainfall                                                                                                             | 32 mm/month                                                  |
| Average wind speed                                                                                                           | 2.12 m/s                                                     |
| Average air temperature                                                                                                      | 19 C                                                         |
| Release rate to air<br>[Al <sub>2</sub> O <sub>3</sub> , CeO <sub>2</sub> , Cu, SiO <sub>2</sub> , TiO <sub>2</sub> , ZnO]   | [46, 12.4, 4.2×10 <sup>-2</sup> , 107.5, 410.5, 142] kg/year |
| Release rate to water<br>[Al <sub>2</sub> O <sub>3</sub> , CeO <sub>2</sub> , Cu, SiO <sub>2</sub> , TiO <sub>2</sub> , ZnO] | [249, 14.8, 0.13, 103, 3.5×10 <sup>3</sup> , 841.4] kg/year  |
| Release rate to soil<br>[Al <sub>2</sub> O <sub>3</sub> , CeO <sub>2</sub> , Cu, SiO <sub>2</sub> , TiO <sub>2</sub> , ZnO]  | [220.7, 61.6, 0.4, 717, 1.3×10 <sup>3</sup> , 294] kg/year   |

194

195

196

197 **Table S7:** Parameters for simulation of environmental distribution of ENMs in Maricopa (USA)

| <b>Parameter</b>                                                                                                             | <b>Parameter value</b>                                    |
|------------------------------------------------------------------------------------------------------------------------------|-----------------------------------------------------------|
| Air-soil interfacial area                                                                                                    | 76.4 km <sup>2</sup>                                      |
| Air-water interfacial area                                                                                                   | 0.16 km <sup>2</sup>                                      |
| Average rainfall                                                                                                             | 13.4 mm/month                                             |
| Average wind speed                                                                                                           | 2 m/s                                                     |
| Average air temperature                                                                                                      | 21 C                                                      |
| Release rate to air<br>[Al <sub>2</sub> O <sub>3</sub> , CeO <sub>2</sub> , Cu, SiO <sub>2</sub> , TiO <sub>2</sub> , ZnO]   | [0.5, 0.14, 4.1×10 <sup>-2</sup> , 1.3, 4.8, 1.7] kg/year |
| Release rate to water<br>[Al <sub>2</sub> O <sub>3</sub> , CeO <sub>2</sub> , Cu, SiO <sub>2</sub> , TiO <sub>2</sub> , ZnO] | [2.9, 0.2, 0.13, 1.2, 41, 9.85] kg/year                   |
| Release rate to soil<br>[Al <sub>2</sub> O <sub>3</sub> , CeO <sub>2</sub> , Cu, SiO <sub>2</sub> , TiO <sub>2</sub> , ZnO]  | [2.6, 0.72, 0.42, 8.4, 15.7, 3.4] kg/year                 |

198

199 **Table S8:** Parameters for simulation of environmental distribution of ENMs in New York (USA)

| <b>Parameter</b>                                                                                                             | <b>Parameter value</b>                                                   |
|------------------------------------------------------------------------------------------------------------------------------|--------------------------------------------------------------------------|
| Air-soil interfacial area                                                                                                    | 783.8 km <sup>2</sup>                                                    |
| Air-water interfacial area                                                                                                   | 429.5 km <sup>2</sup>                                                    |
| Average rainfall                                                                                                             | 98.5 mm/month                                                            |
| Average wind speed                                                                                                           | 5.4 m/s                                                                  |
| Average air temperature                                                                                                      | 11.4 C                                                                   |
| Release rate to air<br>[Al <sub>2</sub> O <sub>3</sub> , CeO <sub>2</sub> , Cu, SiO <sub>2</sub> , TiO <sub>2</sub> , ZnO]   | [99, 27, 9×10 <sup>-2</sup> , 233, 888, 308] kg/year                     |
| Release rate to water<br>[Al <sub>2</sub> O <sub>3</sub> , CeO <sub>2</sub> , Cu, SiO <sub>2</sub> , TiO <sub>2</sub> , ZnO] | [539, 32, 0.3, 223, 7.6×10 <sup>3</sup> , 1.8×10 <sup>3</sup> ] kg/year  |
| Release rate to soil<br>[Al <sub>2</sub> O <sub>3</sub> , CeO <sub>2</sub> , Cu, SiO <sub>2</sub> , TiO <sub>2</sub> , ZnO]  | [477, 133, 0.9, 1.5×10 <sup>3</sup> , 2.9×10 <sup>3</sup> , 637] kg/year |

200  
 201 **Table S9:** Parameters for simulation of environmental distribution of ENMs in Wayne (USA)

| Parameter                                                                                                                    | Parameter value                                                                             |
|------------------------------------------------------------------------------------------------------------------------------|---------------------------------------------------------------------------------------------|
| Air-soil interfacial area                                                                                                    | 204.5 km <sup>2</sup>                                                                       |
| Air-water interfacial area                                                                                                   | 0.4 km <sup>2</sup>                                                                         |
| Average rainfall                                                                                                             | 70.2 mm/month                                                                               |
| Average wind speed                                                                                                           | 4.4 m/s                                                                                     |
| Average air temperature                                                                                                      | 9.8 C                                                                                       |
| Release rate to air<br>[Al <sub>2</sub> O <sub>3</sub> , CeO <sub>2</sub> , Cu, SiO <sub>2</sub> , TiO <sub>2</sub> , ZnO]   | [6.5×10 <sup>-2</sup> , 2×10 <sup>-2</sup> , 4.2×10 <sup>-2</sup> , 0.15, 0.6, 0.2] kg/year |
| Release rate to water<br>[Al <sub>2</sub> O <sub>3</sub> , CeO <sub>2</sub> , Cu, SiO <sub>2</sub> , TiO <sub>2</sub> , ZnO] | [0.35, 2×10 <sup>-2</sup> , 0.13, 0.14, 5, 1.2] kg/year                                     |
| Release rate to soil<br>[Al <sub>2</sub> O <sub>3</sub> , CeO <sub>2</sub> , Cu, SiO <sub>2</sub> , TiO <sub>2</sub> , ZnO]  | [0.3, 8×10 <sup>-2</sup> , 0.4, 1, 2, 0.42] kg/year                                         |

## Supplementary Information References

1. Bhanja S, Sarkar S. Probabilistic Modeling of QCA Circuits Using Bayesian Networks. *IEEE Transactions on Nanotechnology*. 2006;5(6):657–670.
2. Campos CP De, Ji Q. Efficient Structure Learning of Bayesian Networks using Constraints. *Journal of Machine Learning Research*. 2011;12:663–689.
3. Vidakovic B. Probability , Conditional Probability and Bayes Formula. 2004:1–13.
4. Neapolitan RE. Learning Bayesian Networks. *Molecular Biology*. 2003;6(2):674.
5. Liu HH, Cohen Y. Multimedia environmental distribution of engineered nanomaterials. *Environmental Science and Technology*. 2014;48(6):3281–3292.
6. Alexander ER. Sensitivity Analysis in Complex Decision Models. *Journal of the American Planning Association*. 1989;55(3):323–333.
7. Praetorius A, Scheringer M, Hungerbühler K. Development of environmental fate models for engineered nanoparticles - A case study of TiO<sub>2</sub> nanoparticles in the Rhine River. *Environmental science & technology*. 2012;46:6705–6713.
8. Liu HH, Surawanvijit S, Rallo R, Orkoulas G, Cohen Y. Analysis of Nanoparticle Agglomeration in Aqueous Suspensions via Constant-Number Monte Carlo Simulation. *Environmental Science & Technology*. 2011;45(21):9284–9292.
9. Petosa AR, Jaisi DP, Quevedo IR, Elimelech M, Tufenkji N. Aggregation and Deposition of Engineered Nanomaterials in Aquatic Environments: Role of Physicochemical Interactions. *Environmental Science & Technology*. 2010;44(17):6532–6549.
10. Arvidsson R, Molander S, Sandén BA, Hassellöv M. Challenges in Exposure Modeling of Nanoparticles in Aquatic Environments. *Human and Ecological Risk Assessment: An International Journal*. 2011;17(1):245–262.
11. John H. Seinfeld SNP. *Atmospheric Chemistry and Physics: From Air Pollution to Climate Change*. John Wiley & Sons, Ltd.; 2006.
12. Walther C, Büchner S, Filella M, Chanudet V. Probing particle size distributions in natural surface waters from 15 nm to 2 µm by a combination of LIBD and single-particle counting. *Journal of Colloid and Interface Science*. 2006;301(2):532–537.
13. Reynolds RA, Stramski D, Wright VM, Woźniak SB. Measurements and characterization of particle size distributions in coastal waters. *Journal of Geophysical Research: Oceans*. 2010;115(C8):n/a–n/a.
14. Walling DE, Moorehead PW. The particle size characteristics of fluvial suspended sediment: an overview. *Hydrobiologia*. 1989;176(1):125–149.
15. Jacobs MB, Ewing M. Suspended Particulate Matter: Concentration in the Major Oceans. *Science*. 1969;163(3865):380 LP – 383.
16. Fitzgerald, B. C., Susfalk, R. B., Knust AM. Characterization of turbidity and total suspended solids in the Upper Carson River, Nevada. 2008.
17. Bhanja S, Sarkar S. Probabilistic Modeling of QCA Circuits Using Bayesian Networks. *IEEE Transactions on Nanotechnology*. 2006;5(6):657–670.
18. Keller AA, McFerran S, Lazareva A, Suh S. Global life cycle releases of engineered nanomaterials. *Journal of Nanoparticle Research*. 2013;15(6).

**Table S10: ENMs releases to air, water and soil for low and high scenarios (based on Fig. 2 and Fig. S3)**

| City               | Compartment | ENMs Release (kg/yr) (low – high) |                  |              |                  |                  |                |
|--------------------|-------------|-----------------------------------|------------------|--------------|------------------|------------------|----------------|
|                    |             | Al <sub>2</sub> O <sub>3</sub>    | CeO <sub>2</sub> | Cu           | SiO <sub>2</sub> | TiO <sub>2</sub> | ZnO            |
| <b>Berlin</b>      | Air         | 64 – 290                          | 15 – 66          | 0.05 – 1.4   | 105 – 458        | 665 – 1,210      | 236 – 520      |
|                    | Water       | 411 – 5,619                       | 23 – 704         | 0.2 – 24     | 156 – 4,287      | 5,827 – 33,181   | 1,393 – 7,932  |
|                    | Soil        | 389 – 4,429                       | 108 – 876        | 0.7 – 20     | 1,263 – 7,487    | 2,361 – 16,334   | 518 – 3,272    |
| <b>Bern</b>        | Air         | 3 – 192                           | 0.9 – 55         | 0.003 – 1.1  | 8 – 514          | 23 – 494         | 9 – 193        |
|                    | Water       | 9 – 229                           | 0.5 – 47         | 0.005 – 1.15 | 4 – 400          | 119 – 960        | 29 – 272       |
|                    | Soil        | 8 – 90                            | 2 – 18           | 0.01 – 0.4   | 26 – 152         | 48 – 331         | 11 – 66        |
| <b>Houston</b>     | Air         | 26 – 1,076                        | 7 – 301          | 0.02 – 6     | 61 – 2,814       | 232 – 2,857      | 81 – 1,110     |
|                    | Water       | 141 – 2,212                       | 8 – 372          | 0.07 – 10    | 58 – 2,851       | 1,985 – 11,047   | 476 – 2,858    |
|                    | Soil        | 125 – 1,421                       | 35 – 281         | 0.24 – 6     | 405 – 2,402      | 758 – 5,241      | 166 – 1,050    |
| <b>London</b>      | Air         | 90 – 455                          | 18 – 96          | 0.07 – 455   | 132 – 692        | 980 – 1,954      | 319 – 725      |
|                    | Water       | 488 – 6,774                       | 27 – 850         | 0.25 – 6,774 | 184 – 5,190      | 6,938 – 39,976   | 1,656 – 9,554  |
|                    | Soil        | 489 – 5,566                       | 136 – 1,101      | 1 – 5,566    | 1,587 – 9,408    | 2,967 – 20,526   | 651 – 4,112    |
| <b>Los Angeles</b> | Air         | 46 – 1,903                        | 12 – 533         | 0.04 – 11    | 108 – 4,978      | 410 – 5,054      | 142 – 1,963    |
|                    | Water       | 249 – 3,912                       | 15 – 659         | 0.13 – 18    | 103 – 5,043      | 3,512 – 19,541   | 841 – 5,055    |
|                    | Soil        | 221 – 2,513                       | 62 – 497         | 0.42 – 11    | 717 – 4,249      | 1,340 – 9,271    | 294 – 1,857    |
| <b>Maricopa</b>    | Air         | 1 – 22                            | 0.1 – 7          | 0.04 – 0.13  | 1.3 – 60         | 4.8 – 60         | 1.7 – 23       |
|                    | Water       | 3 – 46                            | 0.2 – 8          | 0.13 – 0.21  | 1.2 – 60         | 41 – 229         | 10 – 60        |
|                    | Soil        | 3 – 29                            | 1 – 6            | 0.42 – 1.3   | 8 – 50           | 16 – 109         | 3.4 – 22       |
| <b>New York</b>    | Air         | 99 – 4,118                        | 27 – 1,153       | 0.1 – 23     | 233 – 10,773     | 888 – 10,936     | 308 – 4,249    |
|                    | Water       | 539 – 8,467                       | 32 – 1,425       | 0.3 – 40     | 223 – 10,915     | 7,599 – 42,288   | 1,821 – 10,940 |
|                    | Soil        | 478 – 5,439                       | 133 – 1,076      | 1 – 24       | 1,551 – 9,196    | 2,900 – 20,062   | 637 – 4,019    |
| <b>Wayne</b>       | Air         | 0.1 – 3                           | 0.02 – 0.8       | 0.04 – 0.15  | 0.2 – 7          | 0.6 – 7          | 0.2 – 3        |
|                    | Water       | 0.4 – 6                           | 0.02 – 1         | 0.13 – 0.3   | 0.1 – 7          | 5 – 28           | 1.2 – 7        |
|                    | Soil        | 0.3 – 4                           | 0.09 – 0.7       | 0.42 – 0.62  | 1 – 6            | 2 – 13           | 0.4 – 3        |

**Table S11. Description of ENM Exposure Model Input Parameters**

| <b>Attributes</b>                                      | <b>Unit</b>       | <b>Description</b>                                                                                                                   |
|--------------------------------------------------------|-------------------|--------------------------------------------------------------------------------------------------------------------------------------|
| <b>ENM release to air</b>                              | kg/year           | Estimated ENM emission in air per year in a specific region                                                                          |
| <b>ENM release to water</b>                            | kg/year           | Estimated ENM emission in water per year in a specific region                                                                        |
| <b>ENM release to soil</b>                             | kg/year           | Estimated ENM emission in soil per year in a specific region                                                                         |
| <b>Monthly rainfall (average)</b>                      | mm/month          | Average monthly rainfall (in millimeters) in a selected region                                                                       |
| <b>Monthly temperature (average)</b>                   | °C                | Average monthly temperature (°C) in a selected region                                                                                |
| <b>Monthly windspeed (average)</b>                     | (m/s              | Average monthly windspeed (meters/second) in a selected region                                                                       |
| <b>Land area</b>                                       | km <sup>2</sup>   | air to soil interfacial area of a selected region                                                                                    |
| <b>Water area</b>                                      | km <sup>2</sup>   | Air to water interfacial area of a selected region                                                                                   |
| <b>ENM Concentration (air)</b>                         | ng/m <sup>3</sup> | Estimated ENM concentration in air. Affected by {release (air), temperature, windspeed, rainfall}                                    |
| <b>ENM Concentration (water)</b>                       | ng/L              | Estimated ENM concentration in water. Affected by {release (water), concentration (air), land area, water area, windspeed, rainfall} |
| <b>ENM Concentration (soil)</b>                        | µg/kg             | Estimated ENM concentration in soil. Affected by {release (soil), concentration (air), land area, rainfall}                          |
| <b>ENM Concentration (sediment)</b>                    | µg/kg             | Estimated ENM concentration in sediment. Affected by {Concentration (water)}                                                         |
| <b>Atmospheric Convective residence time</b>           | hour              | The average time for a unit volume of air to reside in the simulated region.                                                         |
| <b>Water convective residence time (Water current)</b> | hour              | The average time for a unit volume of water to reside in the simulated region.                                                       |
| <b>Atmospheric mixing height</b>                       | meter             | The height above the surface throughout which a pollutant/unit volume is dispersed                                                   |
| <b>Soil bulk density</b>                               | g/cm <sup>3</sup> | The weight of soil in a given volume                                                                                                 |
| <b>Sediment bulk density</b>                           | g/cm <sup>3</sup> |                                                                                                                                      |
| <b>Soil top layer depth</b>                            | meter             | Depth of the top layer of soil                                                                                                       |
| <b>Water body depth</b>                                | meter             | Depth of water body                                                                                                                  |
| <b>Suspended solids density</b>                        | g/cm <sup>3</sup> |                                                                                                                                      |
| <b>Attachment factor (air)</b>                         | %                 | Fraction of ENMs attached to ambient particles in air                                                                                |
| <b>Attachment factor (water)</b>                       | %                 | Fraction of ENMs attached to ambient particles in water                                                                              |
| <b>Solubility</b>                                      | ppm               | ENM solubility (the ability for the ENM to dissolve in a solvent (water))                                                            |
